# Supplementary material for: Semi-transparent low-donor content organic solar cells employing cyclopentadithiophene-based conjugated molecules
Source: Royal Society of Chemistry journal article supplement (doi:10.1039/c8tc02863j), 2018-01-01
Supplement: c8tc02863j1.pdf [file c8tc02863j1.pdf]

## Supporting Information

### Semi-Transparent Low-Donor Content Organic Solar Cells Employing Cyclopentadithiophene-Based Conjugated Molecules

Jungho Lee<sup>a,†</sup>, Jeff L. Hernandez<sup>b,†</sup>, Ian Pelse<sup>b</sup>, John R. Reynolds<sup>b\*</sup>, Changduk Yang<sup>a\*</sup>

†These authors contributed to the work equally.

<sup>a</sup>Department of Energy Engineering, School of Energy and Chemical Engineering, Perovtronics Research Center, Low Dimensional Carbon Materials Center, Ulsan National Institute of Science and Technology (UNIST), 50 UNIST-gil, Ulju-gun, Ulsan 44919, South Korea. \*Email: Yang@unist.ac.kr

<sup>b</sup>School of Chemistry and Biochemistry, School of Materials Science and Engineering, Center for Organic Photonics and Electronics, Georgia Tech Polymer Network, Georgia Institute of Technology, Atlanta, Georgia 30332, United States. \*Email: [reynolds@chemistry.gatech.edu](mailto:reynolds@chemistry.gatech.edu).

### Table Contents

1. <sup>1</sup>H NMR spectra of 2EH-CPDT(FBTTh<sub>2</sub>)<sub>2</sub> and 5EN-CPDT(FBTTh<sub>2</sub>)<sub>2</sub>
2. UV-Vis absorption spectra of blend films
3. The UPS spectra of neat films
4. DFT calculated geometry
5. OSCs characteristics
6. 1d GIWAXS line cuts in the  $q_z$  and  $q_{xy}$  directions

- $^1\text{H}$  NMR spectra of 2EH-CPDT(FBTTh<sub>2</sub>)<sub>2</sub> and 5EN-CPDT(FBTTh<sub>2</sub>)<sub>2</sub>.

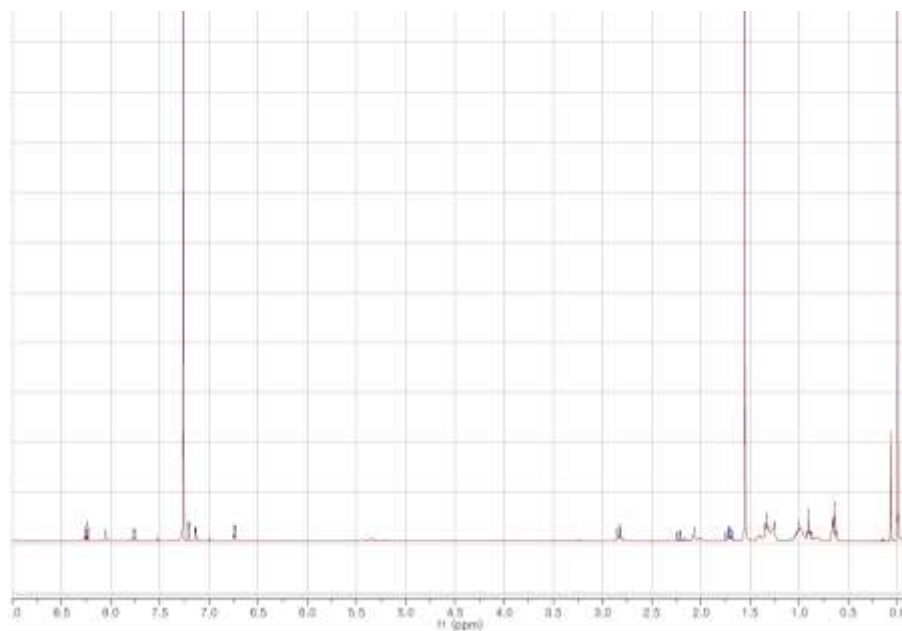

**Fig. S1.**  $^1\text{H}$  NMR spectrum of 2EH-CPDT(FBTTh<sub>2</sub>)<sub>2</sub>.

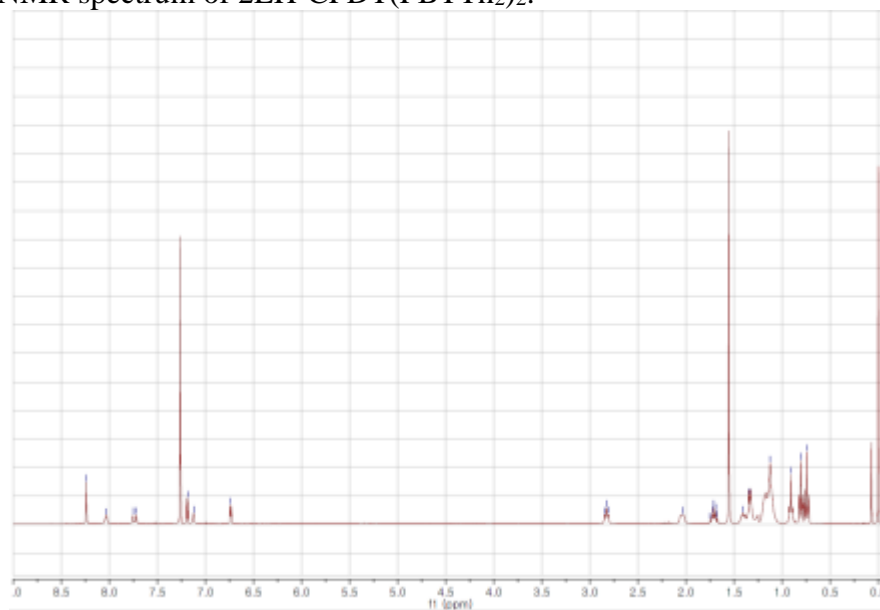

**Fig. S2.**  $^1\text{H}$  NMR spectrum of 5EN-CPDT(FBTTh<sub>2</sub>)<sub>2</sub>.

2. UV-Vis absorption spectra of blend films

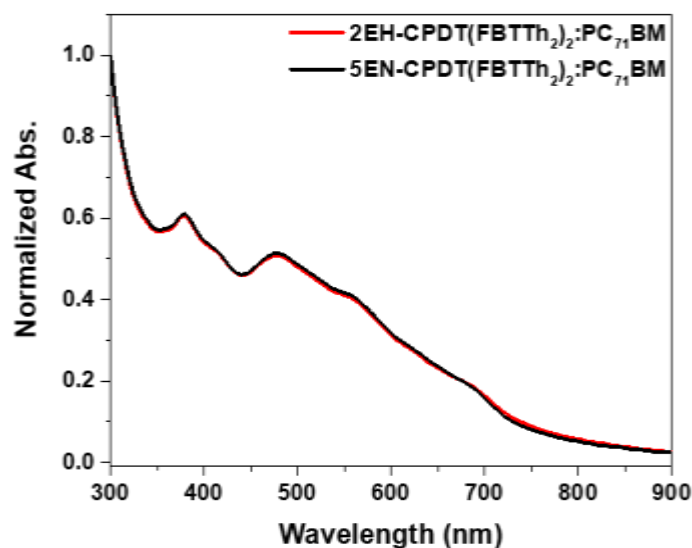

**Fig. S3.** UV-Vis absorption spectra of BHJ films of 2EH-CPDT(FBTTh<sub>2</sub>)<sub>2</sub>:PC<sub>71</sub>BM (1:9) and 5EN-CPDT(FBTTh<sub>2</sub>)<sub>2</sub>:PC<sub>71</sub>BM (1:9).

3. The UPS spectra of neat films

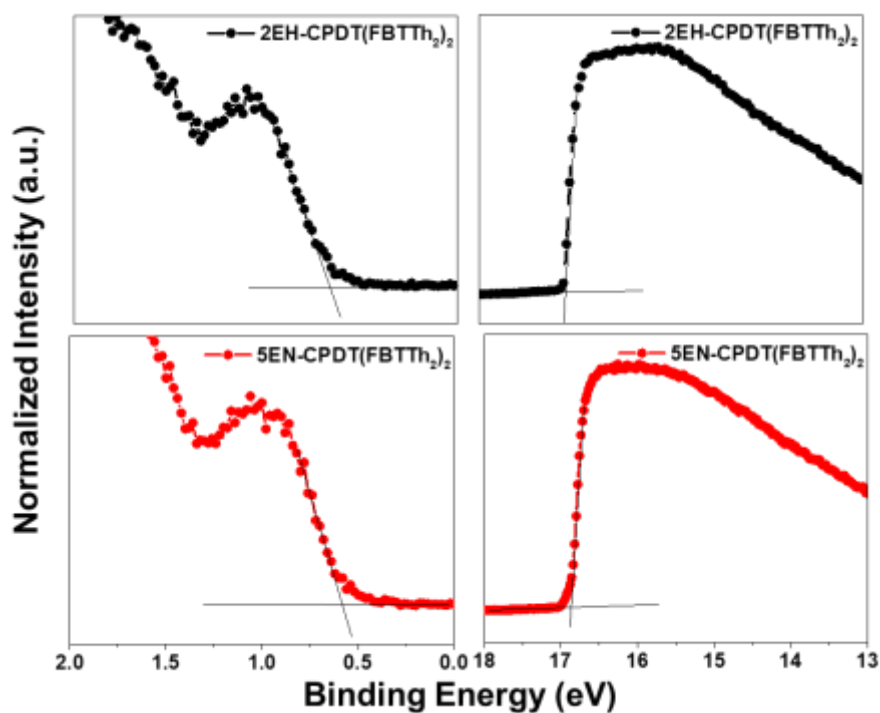

**Fig. S4.** Ultraviolet photoelectron spectra of 2EH-CPDT(FBTTh<sub>2</sub>)<sub>2</sub> and 5EN-CPDT(FBTTh<sub>2</sub>)<sub>2</sub> using HeI emission ( $h\nu = 21.2$  eV) as a light source. The calculated HOMO levels of 2EH-CPDT(FBTTh<sub>2</sub>)<sub>2</sub> and 5EN-CPDT(FBTTh<sub>2</sub>)<sub>2</sub> are  $-5.02$  eV and  $-4.92$  eV, respectively.

#### 4. DFT calculated geometry

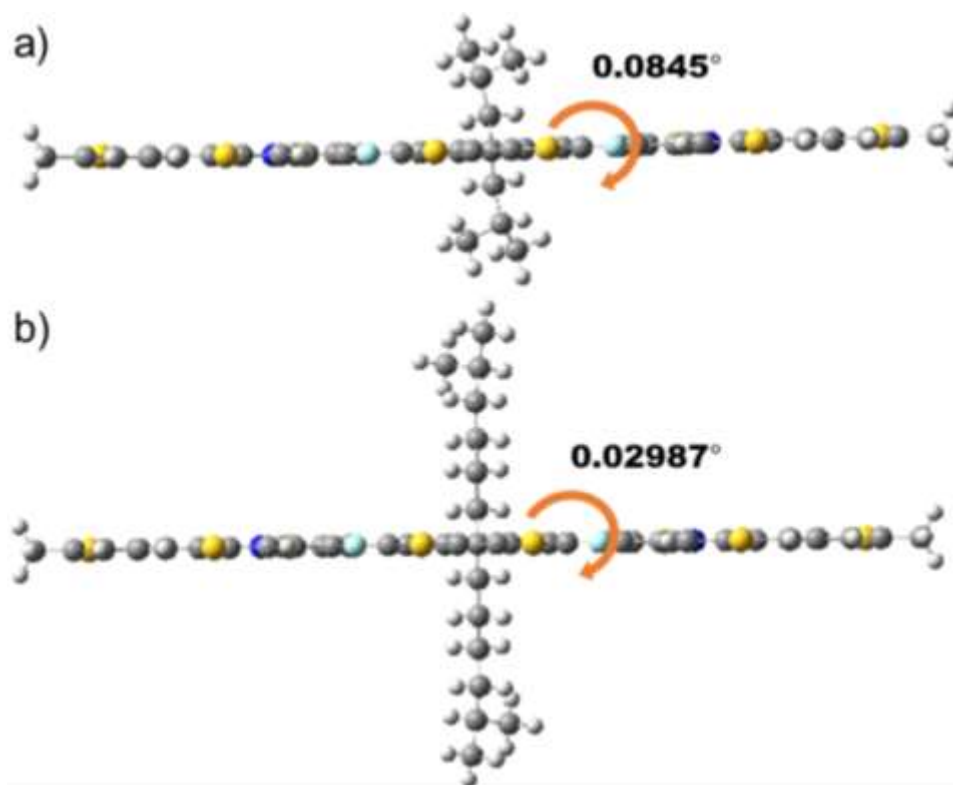

**Fig. S5.** DFT calculated geometry (side view) of a) 2EH-CPDT(FBTTh<sub>2</sub>)<sub>2</sub> and b) 5EN-CPDT(FBTTh<sub>2</sub>)<sub>2</sub>.

#### 5. The OSCs characteristics

**Table S1.** The OSCs characteristics composed of 2EH-CPDT(FBTTh<sub>2</sub>)<sub>2</sub>:PC<sub>71</sub>BM (1:9) with post treatment.

| <i>2EH-CPDT(FBTTh<sub>2</sub>)<sub>2</sub>:PC<sub>71</sub>BM (1:9)</i> | <i>J<sub>sc</sub> (mA cm<sup>-2</sup>)</i> | <i>V<sub>oc</sub> (V)</i> | <i>FF (%)</i> | <i>PCE (%)</i> |
|------------------------------------------------------------------------|--------------------------------------------|---------------------------|---------------|----------------|
| <i>Annealing at 150 °C for 10 min</i>                                  | 2.88                                       | 0.61                      | 24.7          | 0.43           |
| <i>0.5% DIO</i>                                                        | 1.68                                       | 0.60                      | 32.0          | 0.32           |
| <i>1% DIO</i>                                                          | 0.51                                       | 0.29                      | 31.7          | 0.05           |

**Table S2.** The OSC characteristics with different ratio composition of 2EH-CPDT(FBTTh<sub>2</sub>)<sub>2</sub> and 5EN-CPDT(FBTTh<sub>2</sub>)<sub>2</sub> with PC<sub>71</sub>BM.

| <i>D:A Ratio</i> | <i>2EH-CPDT(FBTTh<sub>2</sub>)<sub>2</sub>:PC<sub>71</sub>BM</i> |                           |               |                | <i>5EN-CPDT(FBTTh<sub>2</sub>)<sub>2</sub>:PC<sub>71</sub>BM</i> |                           |                  |                  |
|------------------|------------------------------------------------------------------|---------------------------|---------------|----------------|------------------------------------------------------------------|---------------------------|------------------|------------------|
|                  | <i>J<sub>sc</sub> (mA cm<sup>-2</sup>)</i>                       | <i>V<sub>oc</sub> (V)</i> | <i>FF (%)</i> | <i>PCE (%)</i> | <i>J<sub>sc</sub> (mA cm<sup>-2</sup>)</i>                       | <i>V<sub>oc</sub> (V)</i> | <i>FF (%)</i>    | <i>PCE (%)</i>   |
| 5:5              | 4.85                                                             | 0.82                      | 41.4          | 1.64           | N/A <sup>a</sup>                                                 | N/A <sup>a</sup>          | N/A <sup>a</sup> | N/A <sup>a</sup> |
| 4:6              | 4.64                                                             | 0.75                      | 37.9          | 1.32           | 1.68                                                             | 0.58                      | 14.5             | 0.13             |
| 3:7              | 4.87                                                             | 0.79                      | 41.0          | 1.57           | 1.83                                                             | 0.55                      | 13.3             | 0.13             |
| 2:8              | 5.30                                                             | 0.79                      | 42.2          | 1.76           | 2.10                                                             | 0.62                      | 13.6             | 0.17             |
| 1:9              | 9.50                                                             | 0.81                      | 41.4          | 3.19           | 6.29                                                             | 0.62                      | 39.1             | 1.52             |
| 1:10             | 7.00                                                             | 0.77                      | 45.1          | 2.43           | 5.00                                                             | 0.60                      | 38.2             | 1.15             |
| 1:13             | 5.14                                                             | 0.63                      | 27.5          | 0.91           | 1.23                                                             | 0.61                      | 20.8             | 0.16             |

<sup>a</sup>The film formation was not properly formed for OSCs.

6. 1d GIWAXS line cuts in the  $q_z$  and  $q_{xy}$  directions

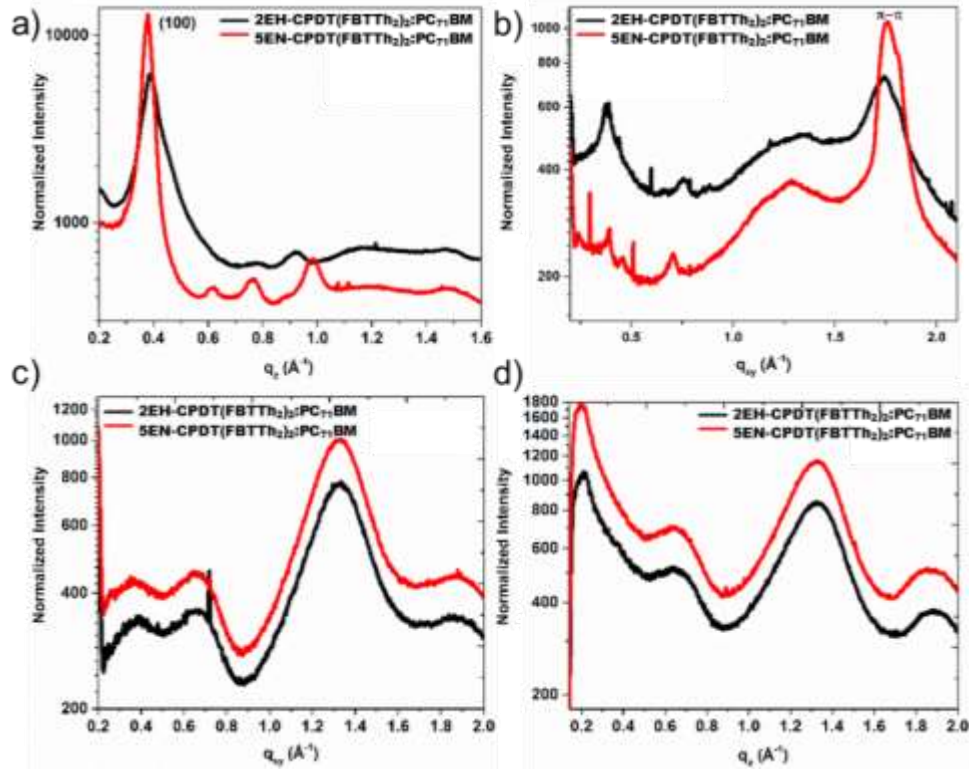

**Fig. S6.** 1d GIWAXS line cuts in the a)  $q_{xy}$  and b)  $q_z$  direction for neat 2EH-CPDT(FBTTh<sub>2</sub>)<sub>2</sub> and 5EN-CPDT(FBTTh<sub>2</sub>)<sub>2</sub> films and line cuts in the c)  $q_{xy}$  and d)  $q_z$  direction for 1:9 weight ratio of blend films 2EH-CPDT(FBTTh<sub>2</sub>)<sub>2</sub>:PC<sub>71</sub>BM and 5EN-CPDT(FBTTh<sub>2</sub>)<sub>2</sub>:PC<sub>71</sub>BM.

**Table S3.** GIWAXS parameters of 2EH-CPDT(FBTTh<sub>2</sub>)<sub>2</sub> and 5EN-CPDT(FBTTh<sub>2</sub>)<sub>2</sub> films. Lamellar and  $\pi$ - $\pi$  stacking distances were determined using  $2\pi/q$ , and crystal coherence length (CCL) was determined using  $2\pi/\text{FWHM}$ .

|                                            | $q_{xy}$                 |                               |                                 | $q_z$                    |                               |                           |
|--------------------------------------------|--------------------------|-------------------------------|---------------------------------|--------------------------|-------------------------------|---------------------------|
|                                            | Lamellar stacking<br>(Å) | $\pi$ - $\pi$ stacking<br>(Å) | CCL<br>( $\pi$ - $\pi$ peak nm) | Lamellar stacking<br>(Å) | $\pi$ - $\pi$ stacking<br>(Å) | CCL<br>(Lamellar peak nm) |
| 2EH-CPDT(FBTTh <sub>2</sub> ) <sub>2</sub> | 16.8                     | 3.6                           | 1.8                             | 16.2                     | N/A                           | 7.7                       |
| 5EN-CPDT(FBTTh <sub>2</sub> ) <sub>2</sub> | 16.0                     | 3.6                           | 3.9                             | 16.6                     | N/A                           | 16.9                      |
